# Supplementary material
Source: MDPI journal article supplement (https://www.mdpi.com/2076-3417/12/19/9892)
Supplement: s1 [file s1]

## SUPPLEMENTARY MATERIALS

Article

**Incidence of Alumni program in the prediction of career success in an Ecuadorian public university.**

**Supplementary Materials:**

**Table S1. Results of best individuals of prediction model 1.**

| Graduate | Graduation<br>year<br>(O3) | Year of<br>employment<br>(O4) | Family<br>income<br>(O10) | Professional<br>satisfaction<br>(S1) | Knowledge<br>satisfaction<br>(S5) | Skill<br>Development<br>(S9) | Elite<br>weighting |
|----------|----------------------------|-------------------------------|---------------------------|--------------------------------------|-----------------------------------|------------------------------|--------------------|
| 1        | 1990                       | 1988                          | 7317                      | 1                                    | 1                                 | 1                            | 0,9919             |
| 2        | 2010                       | 2006                          | 6919                      | 1                                    | 1                                 | 1                            | 0,9742             |
| 3        | 2017                       | 2013                          | 6890                      | 1                                    | 1                                 | 1                            | 0,9729             |
| 4        | 2017                       | 2013                          | 6890                      | 1                                    | 1                                 | 1                            | 0,9729             |
| 5        | 2017                       | 2013                          | 6890                      | 1                                    | 1                                 | 1                            | 0,9729             |
| 6        | 2010                       | 2006                          | 6890                      | 1                                    | 1                                 | 1                            | 0,9729             |
| 7        | 1990                       | 1988                          | 6890                      | 1                                    | 1                                 | 1                            | 0,9729             |
| 8        | 1983                       | 1980                          | 6585                      | 1                                    | 1                                 | 1                            | 0,9593             |
| 9        | 1983                       | 1980                          | 6585                      | 1                                    | 1                                 | 1                            | 0,9593             |
| 10       | 1990                       | 1988                          | 6557                      | 1                                    | 1                                 | 1                            | 0,9593             |
| 11       | 1984                       | 1984                          | 6557                      | 1                                    | 1                                 | 1                            | 0,9581             |
| 12       | 1984                       | 1984                          | 6557                      | 1                                    | 1                                 | 1                            | 0,9581             |
| 13       | 1983                       | 1980                          | 6557                      | 1                                    | 1                                 | 1                            | 0,9581             |
| 14       | 1983                       | 1980                          | 6557                      | 1                                    | 1                                 | 1                            | 0,9581             |
| 15       | 1983                       | 1980                          | 6557                      | 1                                    | 1                                 | 1                            | 0,9581             |
| 16       | 1990                       | 1988                          | 6557                      | 1                                    | 1                                 | 1                            | 0,9581             |
| 17       | 1990                       | 1988                          | 6516                      | 1                                    | 1                                 | 1                            | 0,9581             |
| 18       | 1983                       | 1978                          | 6516                      | 1                                    | 1                                 | 1                            | 0,9563             |
| 19       | 1990                       | 1988                          | 6507                      | 1                                    | 1                                 | 1                            | 0,9563             |
| 20       | 1983                       | 1980                          | 7317                      | 1                                    | 1                                 | 1                            | 0,9559             |
| 21       | 2010                       | 2006                          | 7317                      | 0                                    | 1                                 | 1                            | 0,9548             |
| 22       | 1984                       | 1984                          | 7317                      | 0                                    | 1                                 | 1                            | 0,9548             |
| 23       | 1983                       | 1980                          | 7317                      | 0                                    | 1                                 | 1                            | 0,9548             |
| 24       | 1983                       | 1980                          | 7317                      | 0                                    | 1                                 | 1                            | 0,9548             |
| 25       | 1983                       | 1980                          | 7317                      | 0                                    | 1                                 | 1                            | 0,9548             |
| 26       | 1983                       | 1980                          | 7317                      | 0                                    | 1                                 | 1                            | 0,9548             |
| 27       | 1983                       | 1978                          | 7317                      | 0                                    | 1                                 | 1                            | 0,9548             |
| 28       | 1983                       | 1978                          | 7317                      | 0                                    | 1                                 | 1                            | 0,9548             |
| 29       | 1983                       | 1978                          | 7317                      | 0                                    | 1                                 | 1                            | 0,9548             |
| 30       | 1983                       | 1978                          | 7317                      | 0                                    | 1                                 | 1                            | 0,9548             |
| 31       | 1983                       | 1978                          | 7317                      | 0                                    | 1                                 | 1                            | 0,9548             |
| 32       | 1990                       | 1988                          | 7317                      | 0                                    | 1                                 | 1                            | 0,9548             |
| 33       | 1992                       | 1989                          | 7317                      | 0                                    | 1                                 | 1                            | 0,9548             |
| 34       | 1990                       | 1988                          | 7317                      | 0                                    | 1                                 | 1                            | 0,9548             |
| 35       | 1990                       | 1988                          | 7317                      | 0                                    | 1                                 | 1                            | 0,9548             |
| 36       | 1990                       | 1990                          | 7317                      | 0                                    | 1                                 | 1                            | 0,9548             |
| 37       | 1990                       | 1990                          | 7317                      | 0                                    | 1                                 | 1                            | 0,9548             |
| 38       | 1990                       | 1990                          | 7317                      | 0                                    | 1                                 | 1                            | 0,9548             |
| 39       | 1990                       | 1990                          | 7317                      | 0                                    | 1                                 | 1                            | 0,9548             |
| 40       | 1990                       | 1990                          | 7317                      | 0                                    | 1                                 | 1                            | 0,953              |
| 41       | 2017                       | 2013                          | 7275                      | 0                                    | 1                                 | 1                            | 0,953              |
| 42       | 2017                       | 2013                          | 7275                      | 0                                    | 1                                 | 1                            | 0,953              |
| 43       | 2017                       | 2013                          | 7275                      | 0                                    | 1                                 | 1                            | 0,953              |
| 44       | 2017                       | 2013                          | 7275                      | 0                                    | 1                                 | 1                            | 0,953              |
| 45       | 2013                       | 2013                          | 7275                      | 0                                    | 1                                 | 1                            | 0,953              |
| 46       | 2013                       | 2013                          | 7275                      | 0                                    | 1                                 | 1                            | 0,953              |
| 47       | 2013                       | 2013                          | 7275                      | 0                                    | 1                                 | 1                            | 0,953              |
| 48       | 2012                       | 2008                          | 7275                      | 0                                    | 1                                 | 1                            | 0,953              |
| 49       | 2017                       | 2017                          | 7275                      | 0                                    | 1                                 | 1                            | 0,953              |
| 50       | 2017                       | 2017                          | 7275                      | 0                                    | 1                                 | 1                            | 0,953              |

**Table S2. Results of best individuals of prediction model 2.**

| Graduate | Graduation<br>year<br>(O3) | Year of<br>employment<br>(O4) | Age<br>(O8) | Family<br>income<br>(O10) | Professional<br>satisfaction<br>(S1) | Knowledge<br>satisfaction<br>(S5) | Skill<br>Development<br>(S9) | Elite<br>weighting |
|----------|----------------------------|-------------------------------|-------------|---------------------------|--------------------------------------|-----------------------------------|------------------------------|--------------------|
| 1        | 1991                       | 1990                          | 54          | 7481                      | 1                                    | 0                                 | 1                            | 0,8321             |
| 2        | 2010                       | 2009                          | 45          | 6940                      | 1                                    | 0                                 | 1                            | 0,8179             |
| 3        | 2010                       | 2009                          | 57          | 6890                      | 1                                    | 0                                 | 0                            | 0,8125             |
| 4        | 1984                       | 1983                          | 61          | 6890                      | 1                                    | 0                                 | 1                            | 0,8041             |
| 5        | 1993                       | 1989                          | 55          | 6890                      | 1                                    | 0                                 | 1                            | 0,802              |
| 6        | 1990                       | 1990                          | 61          | 6890                      | 1                                    | 0                                 | 1                            | 0,7958             |
| 7        | 1990                       | 1990                          | 62          | 6890                      | 1                                    | 0                                 | 1                            | 0,795              |
| 8        | 2017                       | 2013                          | 34          | 6720                      | 0                                    | 1                                 | 0                            | 0,7948             |
| 9        | 2017                       | 2013                          | 33          | 6720                      | 1                                    | 0                                 | 1                            | 0,7927             |
| 10       | 1993                       | 1989                          | 55          | 6557                      | 1                                    | 0                                 | 1                            | 0,7907             |
| 11       | 1984                       | 1983                          | 63          | 6557                      | 1                                    | 1                                 | 0                            | 0,7896             |
| 12       | 2010                       | 2006                          | 38          | 6557                      | 1                                    | 0                                 | 1                            | 0,7882             |
| 13       | 2010                       | 2006                          | 38          | 6557                      | 1                                    | 0                                 | 1                            | 0,7832             |
| 14       | 1993                       | 1989                          | 55          | 6557                      | 1                                    | 0                                 | 1                            | 0,7828             |
| 15       | 1982                       | 1982                          | 64          | 6557                      | 1                                    | 0                                 | 1                            | 0,7819             |
| 16       | 1982                       | 1982                          | 62          | 6557                      | 1                                    | 1                                 | 1                            | 0,7818             |
| 17       | 1984                       | 1983                          | 63          | 6520                      | 1                                    | 0                                 | 1                            | 0,7775             |
| 18       | 1993                       | 1989                          | 55          | 6520                      | 1                                    | 0                                 | 1                            | 0,7772             |
| 19       | 1982                       | 1982                          | 63          | 6520                      | 1                                    | 0                                 | 1                            | 0,7761             |
| 20       | 2011                       | 2007                          | 40          | 4380                      | 1                                    | 0                                 | 1                            | 0,7754             |
| 21       | 1993                       | 1989                          | 55          | 4340                      | 1                                    | 0                                 | 1                            | 0,774              |
| 22       | 1982                       | 1982                          | 65          | 4380                      | 1                                    | 1                                 | 1                            | 0,7728             |
| 23       | 2012                       | 2008                          | 40          | 4380                      | 1                                    | 0                                 | 1                            | 0,7674             |
| 24       | 2010                       | 2006                          | 40          | 4380                      | 1                                    | 1                                 | 0                            | 0,766              |
| 25       | 1993                       | 1989                          | 55          | 4380                      | 1                                    | 1                                 | 1                            | 0,7646             |
| 26       | 1984                       | 1983                          | 61          | 4380                      | 1                                    | 1                                 | 1                            | 0,7644             |
| 27       | 1982                       | 1982                          | 62          | 4380                      | 0                                    | 0                                 | 1                            | 0,7639             |
| 28       | 1993                       | 1989                          | 55          | 4380                      | 1                                    | 1                                 | 1                            | 0,7626             |
| 29       | 2007                       | 2003                          | 45          | 4380                      | 1                                    | 0                                 | 1                            | 0,7621             |
| 30       | 1993                       | 1989                          | 55          | 4380                      | 1                                    | 1                                 | 0                            | 0,762              |
| 31       | 1984                       | 1983                          | 63          | 4380                      | 1                                    | 1                                 | 0                            | 0,7587             |
| 32       | 1982                       | 1982                          | 62          | 4380                      | 1                                    | 0                                 | 1                            | 0,7586             |
| 33       | 1993                       | 1989                          | 57          | 4380                      | 1                                    | 0                                 | 1                            | 0,7565             |
| 34       | 1984                       | 1983                          | 63          | 4380                      | 1                                    | 0                                 | 1                            | 0,7556             |
| 35       | 2018                       | 2014                          | 35          | 4380                      | 1                                    | 1                                 | 1                            | 0,7554             |
| 36       | 2018                       | 2014                          | 36          | 4380                      | 1                                    | 1                                 | 0                            | 0,7549             |
| 37       | 1993                       | 1989                          | 56          | 4380                      | 1                                    | 1                                 | 1                            | 0,7545             |
| 38       | 1984                       | 1983                          | 63          | 4380                      | 1                                    | 1                                 | 1                            | 0,7545             |
| 39       | 1993                       | 1989                          | 57          | 4380                      | 1                                    | 0                                 | 1                            | 0,7545             |
| 40       | 1993                       | 1989                          | 57          | 4380                      | 1                                    | 0                                 | 1                            | 0,7531             |
| 41       | 1982                       | 1982                          | 63          | 5571                      | 1                                    | 0                                 | 1                            | 0,7521             |
| 42       | 1982                       | 1982                          | 63          | 5571                      | 1                                    | 1                                 | 1                            | 0,7515             |
| 43       | 1972                       | 1972                          | 75          | 5571                      | 1                                    | 0                                 | 0                            | 0,7502             |
| 44       | 2017                       | 2013                          | 36          | 5571                      | 1                                    | 1                                 | 1                            | 0,7496             |
| 45       | 2017                       | 2017                          | 28          | 5571                      | 1                                    | 1                                 | 1                            | 0,7488             |
| 46       | 2017                       | 2017                          | 28          | 5571                      | 1                                    | 1                                 | 0                            | 0,7484             |
| 47       | 2017                       | 2017                          | 28          | 5571                      | 1                                    | 0                                 | 1                            | 0,7481             |
| 48       | 2017                       | 2017                          | 28          | 5571                      | 1                                    | 0                                 | 1                            | 0,748              |
| 49       | 1984                       | 1983                          | 64          | 5571                      | 1                                    | 0                                 | 1                            | 0,7475             |
| 50       | 1993                       | 1989                          | 58          | 5571                      | 1                                    | 0                                 | 1                            | 0,7471             |

**Table S3. Results of best individuals of prediction model 3.**

| Graduate | Profession<br>(O1) | Graduation<br>year<br>(O3) | Professional<br>satisfaction<br>(S1) | Knowledge<br>satisfaction<br>(S5) | Skill<br>Development<br>(S9) | Elite<br>weighting |
|----------|--------------------|----------------------------|--------------------------------------|-----------------------------------|------------------------------|--------------------|
| 1        | I                  | 2006                       | 1                                    | 1                                 | 0                            | 0,7881             |
| 2        | I                  | 2006                       | 1                                    | 1                                 | 0                            | 0,7877             |
| 3        | I                  | 2013                       | 1                                    | 1                                 | 0                            | 0,7828             |
| 4        | J                  | 2006                       | 1                                    | 1                                 | 1                            | 0,7819             |
| 5        | J                  | 1990                       | 1                                    | 1                                 | 1                            | 0,7815             |
| 6        | A                  | 1990                       | 1                                    | 1                                 | 1                            | 0,7772             |
| 7        | A                  | 2013                       | 1                                    | 1                                 | 1                            | 0,777              |
| 8        | A                  | 2013                       | 1                                    | 1                                 | 1                            | 0,776              |
| 9        | A                  | 2017                       | 1                                    | 1                                 | 1                            | 0,776              |
| 10       | A                  | 2013                       | 1                                    | 1                                 | 1                            | 0,774              |
| 11       | I                  | 2017                       | 1                                    | 1                                 | 1                            | 0,773              |
| 12       | A                  | 2013                       | 1                                    | 1                                 | 1                            | 0,7681             |
| 13       | A                  | 2006                       | 1                                    | 0                                 | 1                            | 0,7665             |
| 14       | I                  | 2006                       | 1                                    | 0                                 | 1                            | 0,7641             |
| 15       | A                  | 2006                       | 1                                    | 0                                 | 1                            | 0,7644             |
| 16       | A                  | 1984                       | 1                                    | 0                                 | 1                            | 0,763              |
| 17       | A                  | 1980                       | 1                                    | 0                                 | 1                            | 0,761              |
| 18       | A                  | 1988                       | 1                                    | 1                                 | 1                            | 0,7583             |
| 19       | A                  | 1978                       | 1                                    | 1                                 | 1                            | 0,757              |
| 20       | A                  | 1980                       | 1                                    | 0                                 | 1                            | 0,753              |
| 21       | A                  | 1990                       | 1                                    | 0                                 | 1                            | 0,7515             |
| 22       | E                  | 1990                       | 1                                    | 0                                 | 1                            | 0,7502             |
| 23       | E                  | 2013                       | 1                                    | 0                                 | 1                            | 0,7476             |
| 24       | E                  | 2013                       | 1                                    | 0                                 | 1                            | 0,7458             |
| 25       | A                  | 1990                       | 1                                    | 0                                 | 1                            | 0,7434             |
| 26       | A                  | 1990                       | 1                                    | 0                                 | 1                            | 0,7411             |
| 27       | A                  | 2017                       | 1                                    | 1                                 | 1                            | 0,7397             |
| 28       | A                  | 2017                       | 1                                    | 1                                 | 1                            | 0,739              |
| 29       | I                  | 2013                       | 1                                    | 1                                 | 1                            | 0,7361             |
| 30       | I                  | 1984                       | 1                                    | 0                                 | 1                            | 0,7338             |
| 31       | A                  | 1984                       | 1                                    | 0                                 | 0                            | 0,7312             |
| 32       | A                  | 1980                       | 1                                    | 0                                 | 0                            | 0,729              |
| 33       | E                  | 2006                       | 1                                    | 0                                 | 1                            | 0,724              |
| 34       | E                  | 2006                       | 0                                    | 1                                 | 1                            | 0,7215             |
| 35       | J                  | 1988                       | 0                                    | 1                                 | 0                            | 0,7198             |
| 36       | I                  | 1988                       | 0                                    | 1                                 | 1                            | 0,7154             |
| 37       | I                  | 1984                       | 0                                    | 1                                 | 1                            | 0,7114             |
| 38       | I                  | 2013                       | 0                                    | 1                                 | 1                            | 0,7059             |
| 39       | I                  | 2013                       | 0                                    | 1                                 | 1                            | 0,7016             |
| 40       | I                  | 2006                       | 0                                    | 1                                 | 1                            | 0,6985             |
| 41       | I                  | 2006                       | 0                                    | 1                                 | 1                            | 0,6946             |
| 42       | I                  | 1990                       | 0                                    | 1                                 | 1                            | 0,694              |
| 43       | I                  | 1990                       | 0                                    | 1                                 | 1                            | 0,6918             |
| 44       | A                  | 1990                       | 0                                    | 1                                 | 0                            | 0,6843             |
| 45       | A                  | 1990                       | 0                                    | 1                                 | 1                            | 0,6817             |
| 46       | A                  | 2006                       | 0                                    | 1                                 | 1                            | 0,6795             |
| 47       | A                  | 2006                       | 0                                    | 1                                 | 1                            | 0,6778             |
| 48       | A                  | 2013                       | 0                                    | 1                                 | 1                            | 0,6741             |
| 49       | I                  | 2013                       | 0                                    | 1                                 | 1                            | 0,6712             |
| 50       | I                  | 2013                       | 0                                    | 1                                 | 1                            | 0,6651             |

I: Engineering; J: Jurisprudence; A: Administration and E: Economy
